# Supplementary material
Source: PubMed Central journal article supplement (PMC2761354)
Supplement: 0905566106_0905566106SI.pdf [file 0905566106_0905566106SI.pdf]

# Supporting Information

Kang and Ryoo 10.1073/pnas.0905566106

## SI Text

### Materials and Methods

**Immunohistochemistry and Western Blots.** All fluorescent images were obtained with a Zeiss LSM510 confocal microscope, using  $\times 20$  or  $\times 40$  objective lenses. The following antibodies were used: monoclonal anti-rhodopsin1 (1:50 for immunohistochemistry; 1:200 for Western blot; Developmental Studies Hybridoma Bank, University of Iowa), mouse anti-profilin (1:50 for Western blot; Developmental Studies Hybridoma Bank, University of Iowa), monoclonal 9E10 (1:500 for immunohistochemistry; Roche) and rabbit anti-Myc (1:500 for tissue-labeling, Santa Cruz) antibodies for Myc-tag detection, rabbit anti-cleaved caspase-3 antibody (1:50; Cell Signaling Technologies), guinea-pig anti-Hsc3 (1:50 for immunohistochemistry;) and rabbit anti-GFP (1:2000 for tissue-labeling, Molecular Probes) antibodies. Rhodamine phalloidin (Molecular Probes) was used to detect

rhabdomeres. Immunoprecipitation was performed with anti-myc (Roche), anti-HA antibody (Roche), and protein G-coupled Sepharose beads (Roche).

**Analysis of Retinal Degeneration.** Flies with the relevant genotypes were crossed into *cn, br*  $-/-$  background to eliminate eye pigments, which may otherwise affect the course of retinal degeneration. These flies were selected and reared in vials (30–50 flies in each vial), in permanent light. The vials were changed frequently to avoid mixing the flies with eventual progeny. The quantification of pseudopupils was performed on a pad under blue fluorescent light after anesthetizing the flies with CO<sub>2</sub>. Semithin plastic sections were performed as described previously and toluidine blue was used as a dye to increase the contrast.

**Statistics.** Statistical significance was applied through unpaired Student's *t*-test analyses.

1. Ryoo HD, Domingos PM, Kang MJ, Steller H (2007) Unfolded protein response in a *Drosophila* model for retinal degeneration. *EMBO J* 26:242–252.

2. Tomlinson A, Ready DF (1987) Cell fate in the *Drosophila* ommatidium. *Dev Biol* 123:264–275.

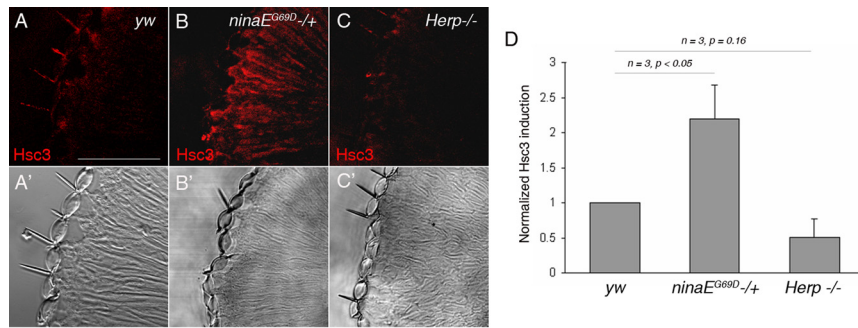

**Fig. S1.** Loss of *Herp* does not induce *hsc3* expression. (A–C) Horizontal sections of 1-day-old adult eyes labeled with anti-Hsc3 antibody (red). (A'–C') Bright field image of the samples shown in A–C. Compared to the basal level of Hsc3 detected in a control fly (A), *ninaE<sup>G69D</sup>/+* retina have significantly higher levels of Hsc3 (B), indicative of UPR activation. Hsc3 levels remain at a basal level in *Herp*<sup>-/-</sup> retina (C). (D) Comparison of the anti-Hsc3 labeling intensity in these retina (average of  $n = 3$ ), with the value from the control fly (*y,w*) retina set at 1. Scale bar represents 50  $\mu$ M (A). Genotypes: *y,w* (A, A'), *w*; *ninaE<sup>G69D</sup>/+* (B, B'), *w*; *Herp<sup>G13463</sup>/Herp<sup>G13463</sup>* (C, C').

A

```

Drosophila 1 -----MQLLSSVC MALTSAVIGRAYORQQFYPAVVYITKSNASGCVHYIQFVHVVFEGKLLSKIFLGLRAAEPHELLERSWYATETCLAFVFRDDFPRFVALFTV
Human 1 ----MFRTAVMMAASLALTCAYWARAYLHDFYPTVVYITKSSPMQVLYIGAFVIVLLGKVMGKVFPGQLRAAEPHELLERSWYATETCLAFVFRDDFPRFVALFTL
S. cerevisiae 1 MYPNRRKQDAIFVWYITLLEFYCVESATKISVSEFLQVTLKLNKGNLNLVLSIFILLNSTLLMQLLRAALFGLRLEIDPEHEIFPERLPETIINLFFMSSEIFHERYFFTVARFGL
Drosophila 108 LLLFLKSPHMLADRDVDFMER---SPVGCLEFIRVGSGLVGLGILTYVLIHAYNSHILVR-----SPTVQLVFGFEYAILLLVYASATKRYVLLAAEMR-TDTPWGNKAV
Human 110 LLLFLKSPHMLADRDVDFMER---SPNISLFLFCRIVSLIFLGLGILDFVSHAYNSHILVR-----CASVOLVFGFEYAILLTMVLIIFIKYVLEHSDVLDQ-SENPLGNKAV
S. cerevisiae 114 LLLYLKVFHWILKDRLEALLQSINDSTTKMTLIFSRFSFNILVLLAVVDYQIITRCSISSEYINQKSDIESLSLYLIQVMEFTMLLIDLNLPLLOTCLNFWEFYRSOOSLSNEN
Drosophila 209 FLLYTEFVIGLTKVVLVILFVVIKAREYALNPFVFRPFETIRPKKALMTVIMSRRAIRNMNTLYPDATPEELRQSDNDCIICREDWVNHRSKRLPCGHIFHTSCLRSWFQR
Human 211 FLLYTEFVIGLTKVVLVILFVVIKAREYALNPFVFRPFETIRPKKALMTVIMSRRAIRNMNTLYPDATPEELQAMDNVCICREDWVNGARLPCGHIFHTSCLRSWFQR
S. cerevisiae 229 NHIIVKGDFFD-----ENTVESDQSOPVLENDDDDDDDDRQFTGLEGRFVYKAIQVFTRELKTALEHLSMLEPFRMPHMLKQWVMDLALYOSGTSLSLKWRRNKKO
Drosophila 321 QQTCTPCRLNHLRPTVNSTAMPKQGDVAVAANAAGNHIHAAAG-----VQVAGE-----VPPAPTAVVVDGNQARQVNVVAGQALPPNFADLFGDASG
Human 323 QQTCTPCRLNHLRPTVNSTAMPKQGDVAVAANAAGNHIHAAAG-----VQVAGE-----VPPAPTAVVVDGNQARQVNVVAGQALPPNFADLFGDASG
S. cerevisiae 327 LDDTLVTVTVEQLQNSADDDNICIICMDELHIS-----PNQQTWKNKKNKPPRLPCGHILHLSCLKNWHERS
Drosophila 410 LPNGLPHLAGLQIPVPMVMISDQW---IPRFGYLTLPLPPIQDLDLTFVFEELRANEGLORDEIVOREKLLQNLNLMESDQIMMSQYQSLSRRLQLTAVTFAAT
Human 436 TASPFGSGSAPEAGLQVFPFPMGMPPLPPPAEP-DMVVG--HAGFAGLDFEELRANEGLORDEIVOREKLLQNLNLMESDQIMMSQYQSLSRRLQLTAVTFAAT
S. cerevisiae 394 QTCP-----ICRLPVFDEKGNWQITFTS-----NSDITTQTVVDTSTGAIATDQGGFANEVLLPFTITSPDIFRIVPTCNIDTAMRTS
Drosophila 515 AVNGSADSSVYDMPSTSATAMAQLETHOVPTAAASSASPTMFAEVTTEDLGADADEDDIPSTATFAVSPINSDADFPENSSSELGLRRLRKLFLERNKSAHNTERTTAE
Human 538 SVNSTEETATTVVAASSTISIPSE--ATITPFGASPPAPMERP-----PABESVGTTEMPDGE--PDAALRRLRKLQLES--PVMH
S. cerevisiae 474 -TSTPSPVWYFPHLHKTGDNVSGSSRSAYEFLITNSDEKENGIPVR-----LTIENHEVNSLHGDGGGQIAKKRIMVDPKFIQHI
    
```

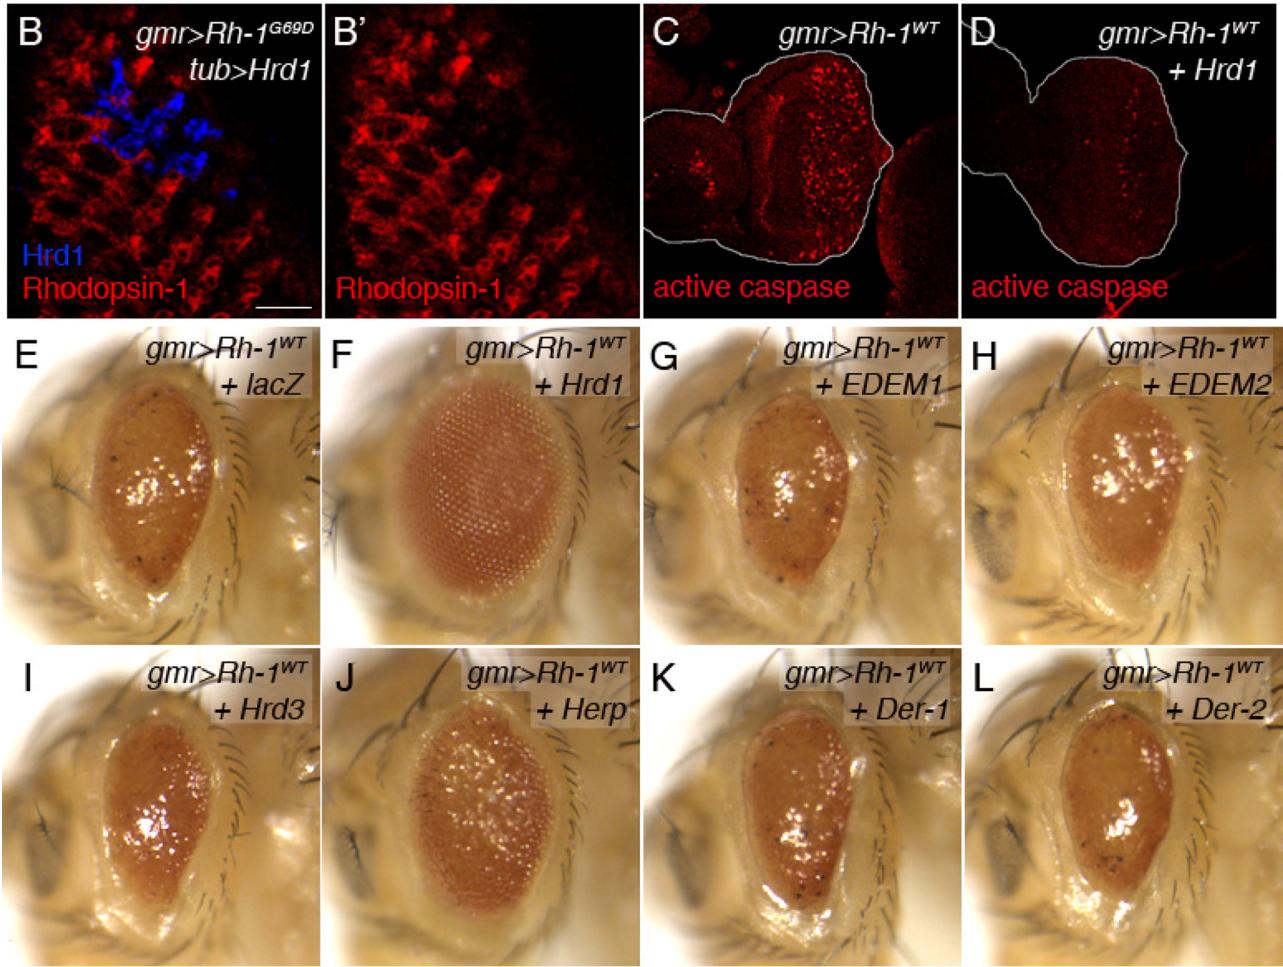

**Fig. S2.** Overexpression of putative ERAD components in *Drosophila*. (A) ClustalW amino acid alignment between *Drosophila* *hrd1* and its human homolog. Dark shading indicates identity, whereas light shading indicates similarity. The numbers refer to amino acids. The solid line indicates the RING-finger domain (amino acid numbers 289–331). The regions with the predicted transmembrane domains are marked by dotted lines. (B, B') The effect of Hrd1 on misexpressed Rh-1<sup>G69D</sup>, as determined through Hrd1 expressing mosaic clones. Here, Rh-1<sup>G69D</sup> (red) was expressed through the *gmr* promoter while Hrd1 (blue) was expressed in mosaic clones through the *tubulin* promoter. (C, D) The misexpression of Rh-1<sup>WT</sup> led to massive apoptosis as detected by anti-cleaved caspase labeling (C, red), which was almost completely suppressed by Hrd1 co-expression (D, red). (E–L) External adult eyes misexpressing Rh-1<sup>WT</sup> together with the indicated *Drosophila* ERAD factors or control genes. Shown are representative images of flies co-expressing lacZ (E), Hrd1 (F), EDEM1 (G), EDEM2 (H), Hrd3 (I), Herp (J), Derlin-1 (K), Derlin-2 (L). Only Hrd1 was sufficient to suppress the eye ablation phenotype (F). Scale bar represents 20 μm (B). Genotypes: *hs-flp;UAS-Hrd1/+;tub>GFP>Gal4/gmr-Rh-1<sup>G69D</sup>* (B, B'), *gmr-Gal4/+;UAS-Rh-1<sup>WT</sup>/+* (C), *gmr-Gal4/UAS-Hrd1;UAS-Rh-1<sup>WT</sup>/+* (D, F), *gmr-Gal4/UAS-lacZ;UAS-Rh-1<sup>WT</sup>/+* (E), *gmr-Gal4/+;UAS-Rh-1<sup>WT</sup>/UAS-EDEM1* (G), *gmr-Gal4/UAS-EDEM2;UAS-Rh-1<sup>WT</sup>/+* (H), *gmr-Gal4/UAS-Hrd3;UAS-Rh-1<sup>WT</sup>/+* (I), *gmr-Gal4/+;UAS-Rh-1<sup>WT</sup>/UAS-Herp* (J), *gmr-Gal4/+;UAS-Rh-1<sup>WT</sup>/UAS-Der-1* (K), *gmr-Gal4/+;UAS-Rh-1<sup>WT</sup>/UAS-Der-2* (L).

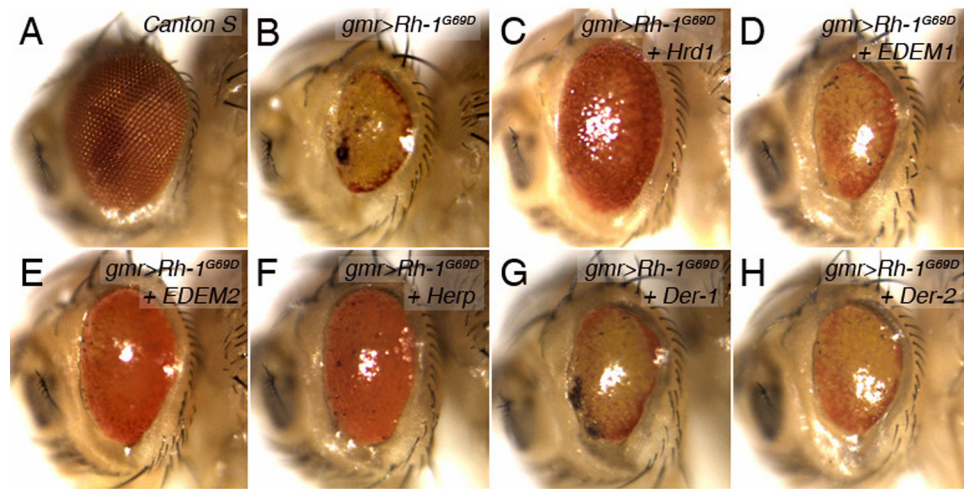

**Fig. S3.** The eye phenotype caused by misexpression of Rh-1<sup>G69D</sup> was partially rescued by Hrd1, EDEM2, and Herp. Stress levels are reflected by the degree of eye size reduction and loss of pigmentation due to pigment cell death. (A) A control wild type fly. (B) A fly expressing Rh-1<sup>G69D</sup> alone. (C–H) Representative images of fly eyes misexpressing Rh-1<sup>G69D</sup> together with the indicated *Drosophila* ERAD factors, Hrd1 (C), EDEM1 (D), EDEM2 (E), Herp (F), Derlin-1 (G), Derlin-2 (H). Hrd1, EDEM2, and Herp partially suppressed the eye phenotype caused by Rh-1<sup>G69D</sup>. Genotypes: Canton S (A), *gmr-Gal4, UAS-Rh-1<sup>G69D</sup>/+* (B), *gmr-Gal4, UAS-Rh-1<sup>G69D</sup>/+;UAS-Hrd1* (C), *gmr-Gal4, UAS-Rh-1<sup>G69D</sup>/+;UAS-EDEM1/+* (D), *gmr-Gal4, UAS-Rh-1<sup>G69D</sup>/+;UAS-EDEM2* (E), *gmr-Gal4, UAS-Rh-1<sup>G69D</sup>/+;UAS-Herp/+* (F), *gmr-Gal4, UAS-Rh-1<sup>G69D</sup>/+;UAS-Der-1* (G), *gmr-Gal4, UAS-Rh-1<sup>G69D</sup>/+;UAS-Der-2/+* (H).



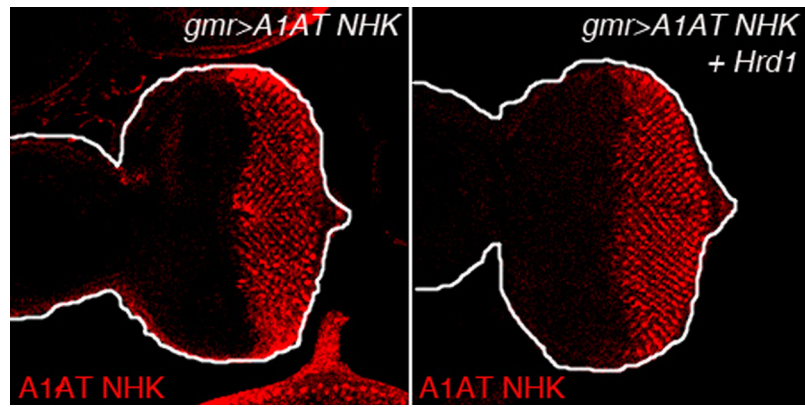

**Fig. S4.** *Drosophila* Hrd1 does not affect NHK stability. The level of NHK was detected by anti-A1AT labeling (red). Genotypes: *gmr-Gal4/UAS-NHK* (Left), *gmr-Gal4/UAS-NHK;UAS-Hrd1/+* (Right).
